# Supplementary material for: Dietary intervention using (1,3)/(1,6)-β-glucan, a fungus-derived soluble prebiotic ameliorates high-fat diet-induced metabolic distress and alters beneficially the gut microbiota in mice model
Source: Springer Nature journal article supplement (doi:10.1007/s00394-019-02110-5), 2019-10-29
Supplement: MOESM1 [file 17326688]

**Dietary intervention using (1,3)/ (1,6)-β-glucan, a fungus-derived soluble prebiotic ameliorates high-fat diet-induced metabolic distress and alters beneficially the gut microbiota in mice model**

**Karthika Muthuramalingam1, Vineet Singh2, Changmin Choi1, Seung In Choi3, Young Mee Kim1, Tatsuya Unno2,4, *, Moonjae Cho1,5,6, ***

**1** Department of Biochemistry, School of Medicine, Jeju National University, Jeju 63243, Republic of Korea

**2** Faculty of Biotechnology, School of Life Sciences, SARI, Jeju National University, Jeju 63243, Republic of Korea

**3** Department of Pharmaceutical Research Institute, Quegen Biotech Co. Ltd., Seoul 429931, Republic of Korea

**4** Subtropical/Tropical Organism Gene Bank, Jeju National University, Jeju 63243, Republic of Korea

**5** Institute of Medical Science,Jeju National University, Jeju 63241, Republic of Korea

**6** Interdisciplinary Graduate Program in Advanced Convergence Technology & Science, Jeju National University, Jeju 63241, Republic of Korea

***** Authors to whom correspondence should be addressed

E-mail: [tatsu@jejunu.ac.kr](mailto:tatsu@jejunu.ac.kr) (T.U)

[moonjcho@jejunu.ac.kr](mailto:moonjcho@jejunu.ac.kr) (M.J.C)


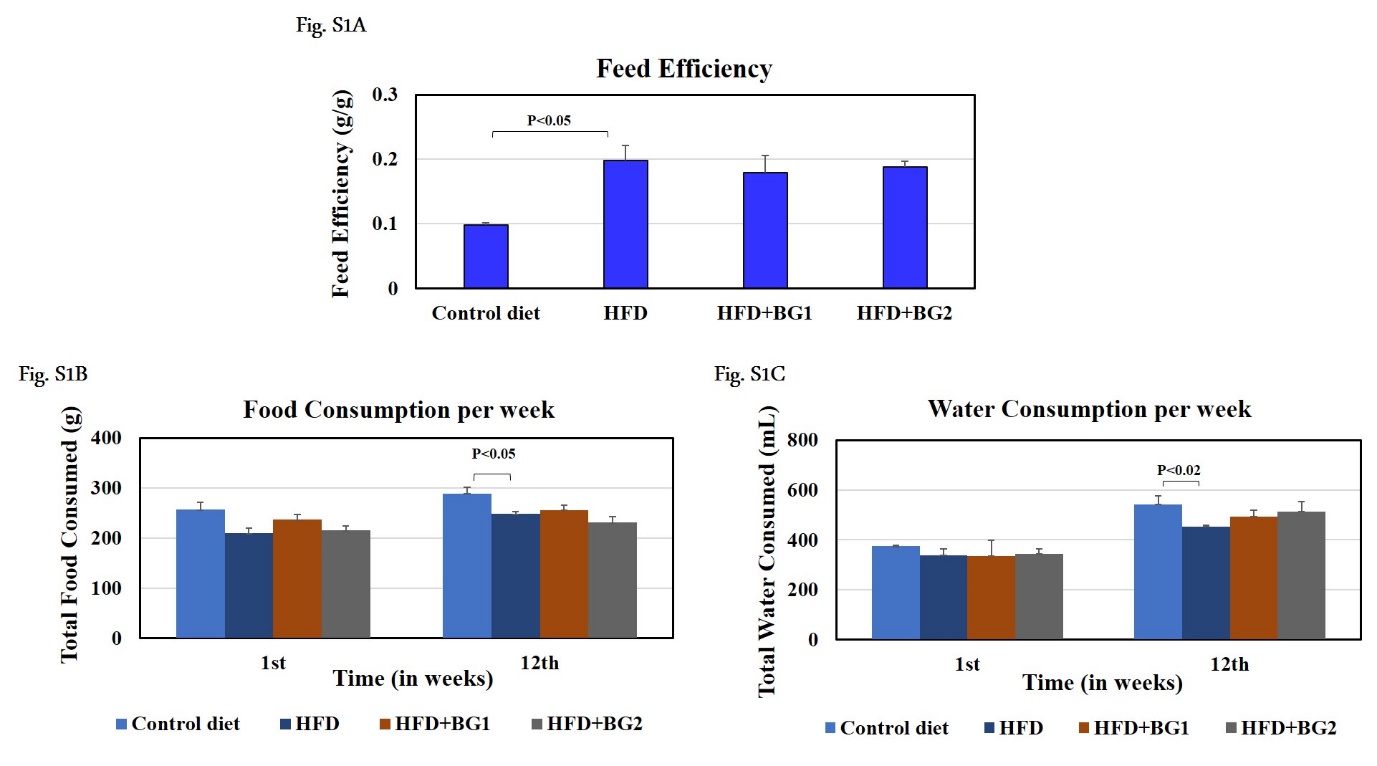


**Online Resource Fig.S1:** Effect of dietary β-glucan on energy intake. a: Feed efficiency, b: Food consumption, and c: Water consumption.


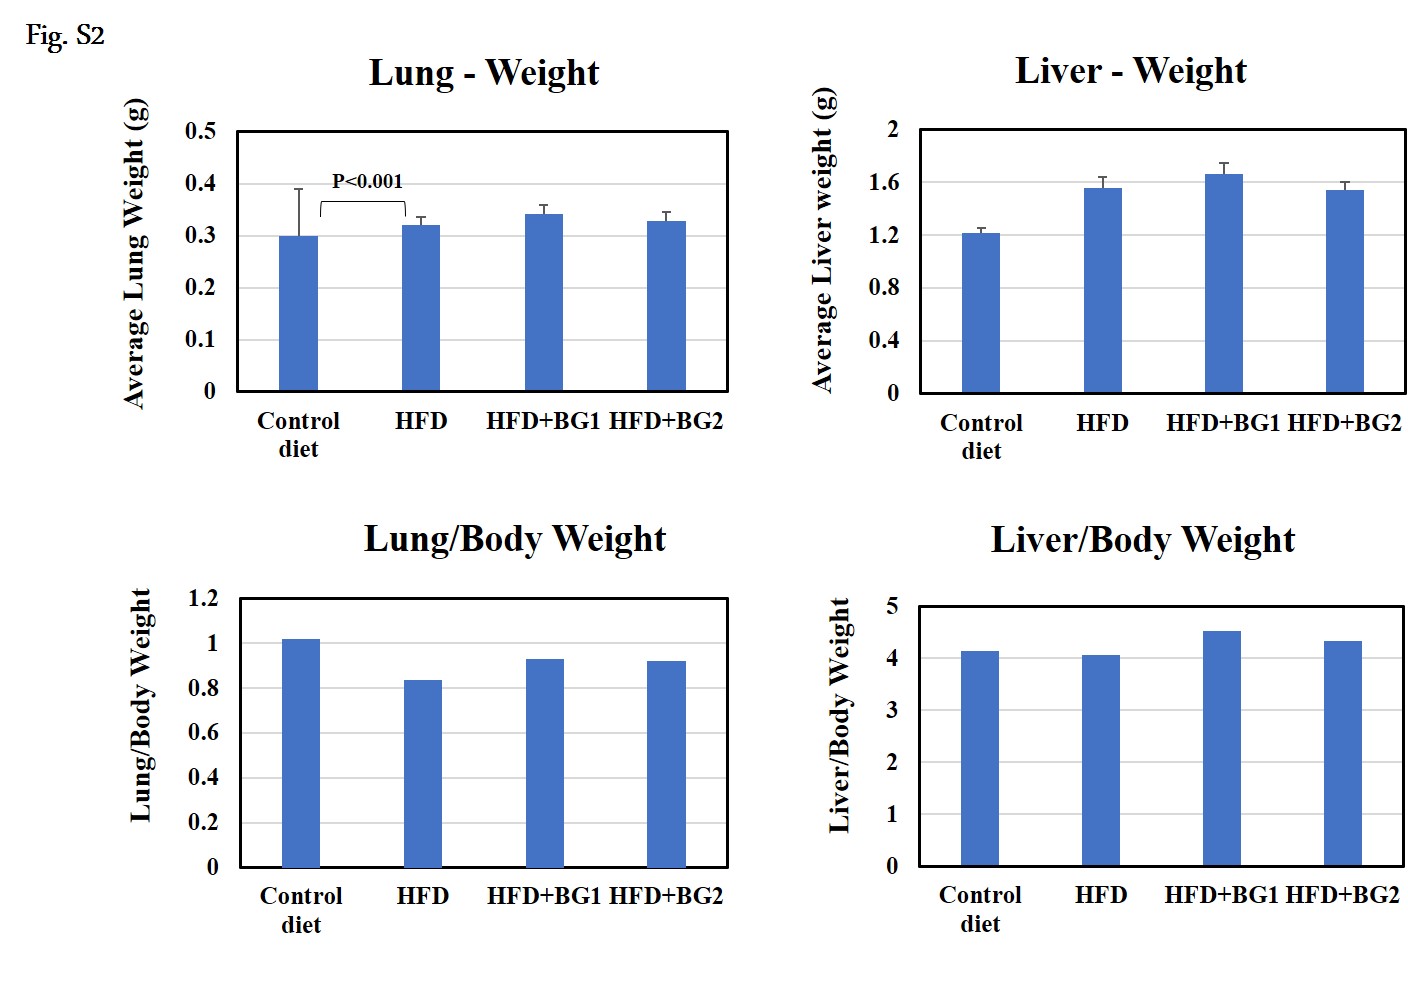


**Online Resource Fig.S2:** Effect of dietary β-glucan on pathophysiology of mice. A: Lung weight and lung/body weight and B: Liver weight and liver/body weight.


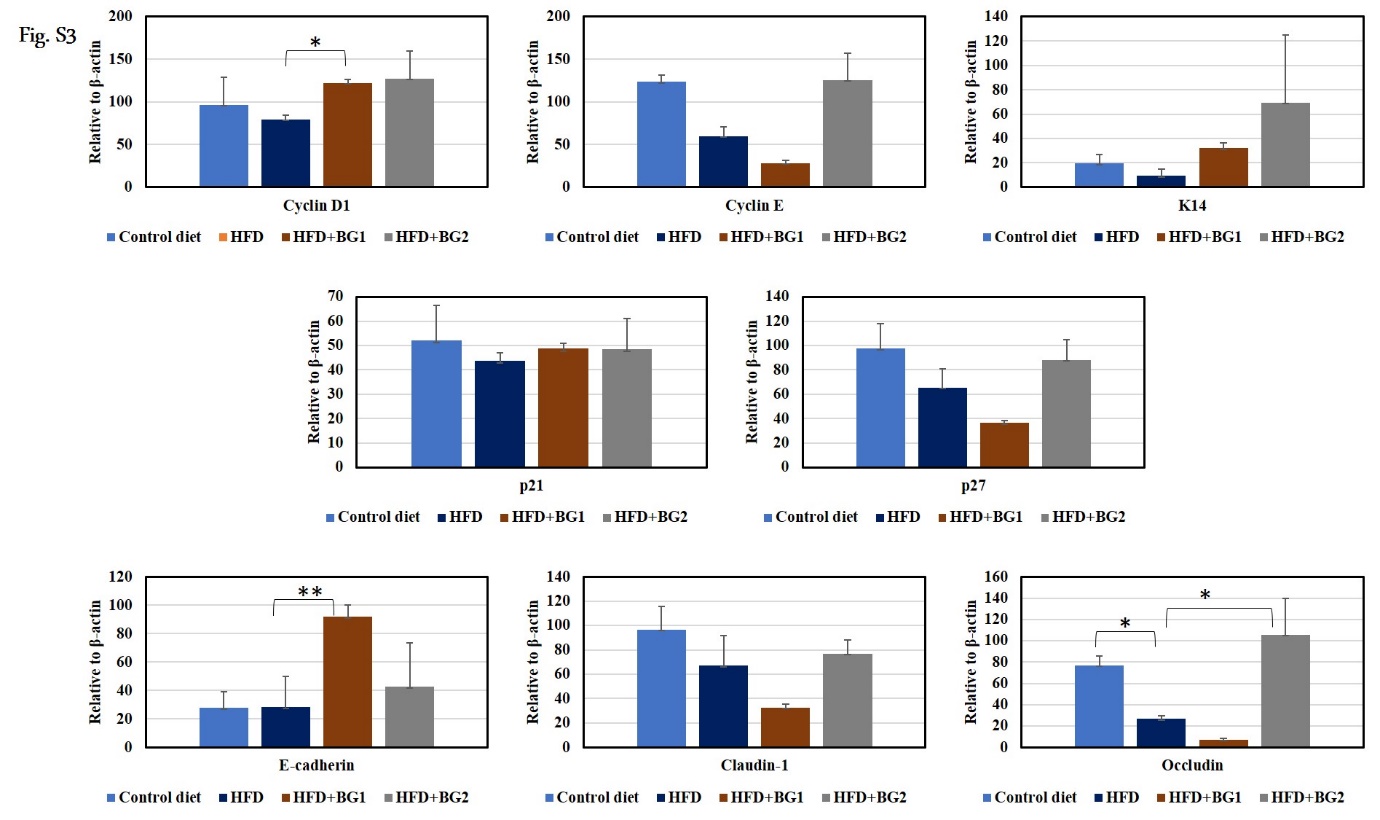
 **Online Resource Fig.S3:** Assessment of expression of intestinal proteins involved in colon cell proliferation, differentiation, and tight junction markersin HFD, HFD + BG1, and HFD + BG2 groups.


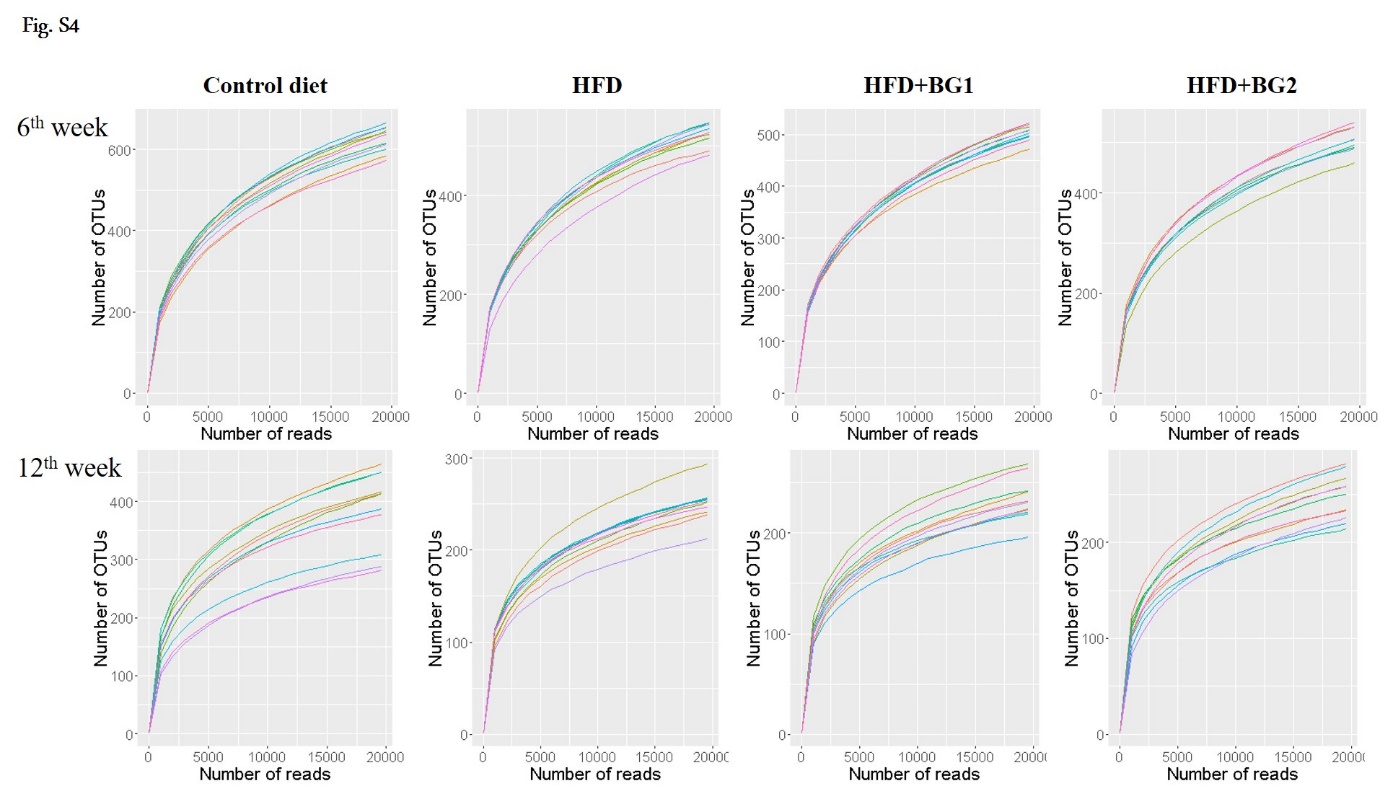
 **Online Resource Fig.S4:** Evaluation of sequence depth by rarefaction curve analysis.


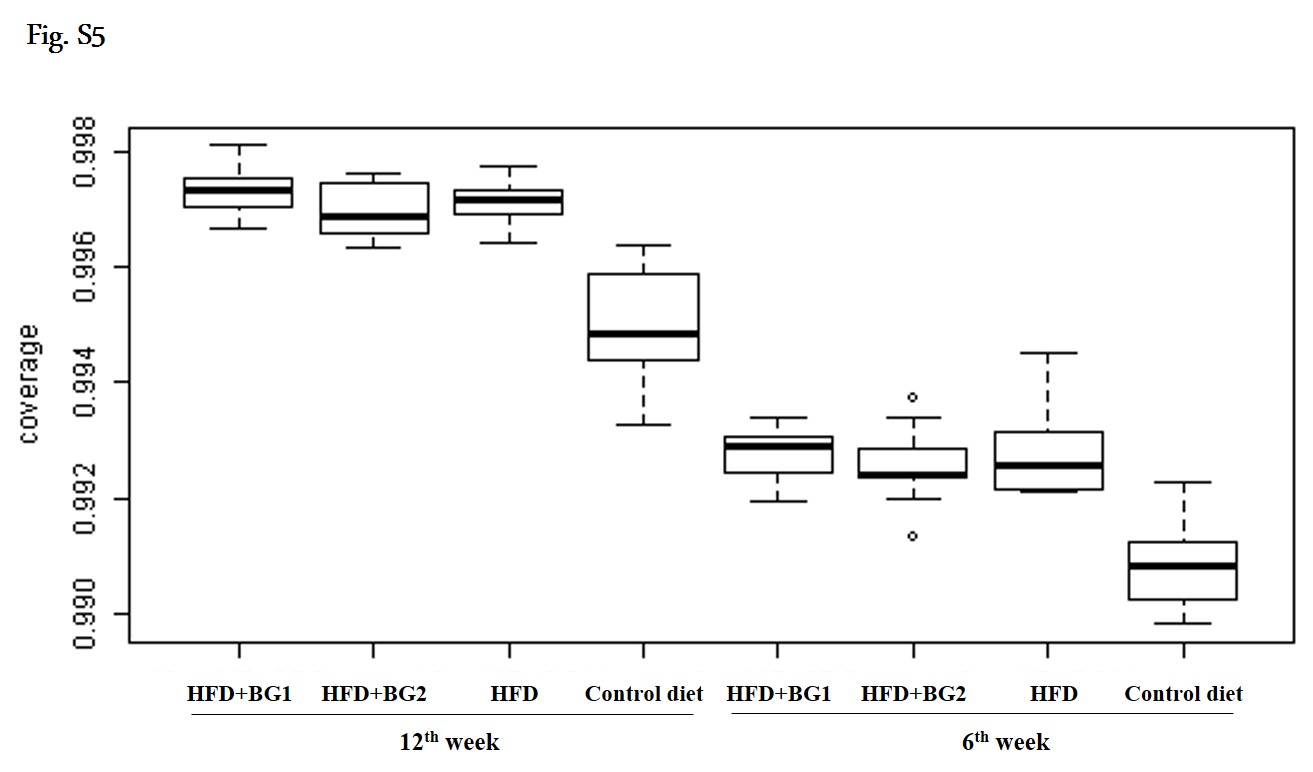
 **Online Resource Fig.S5:** Good’s coverage obtained for each sample in this study.


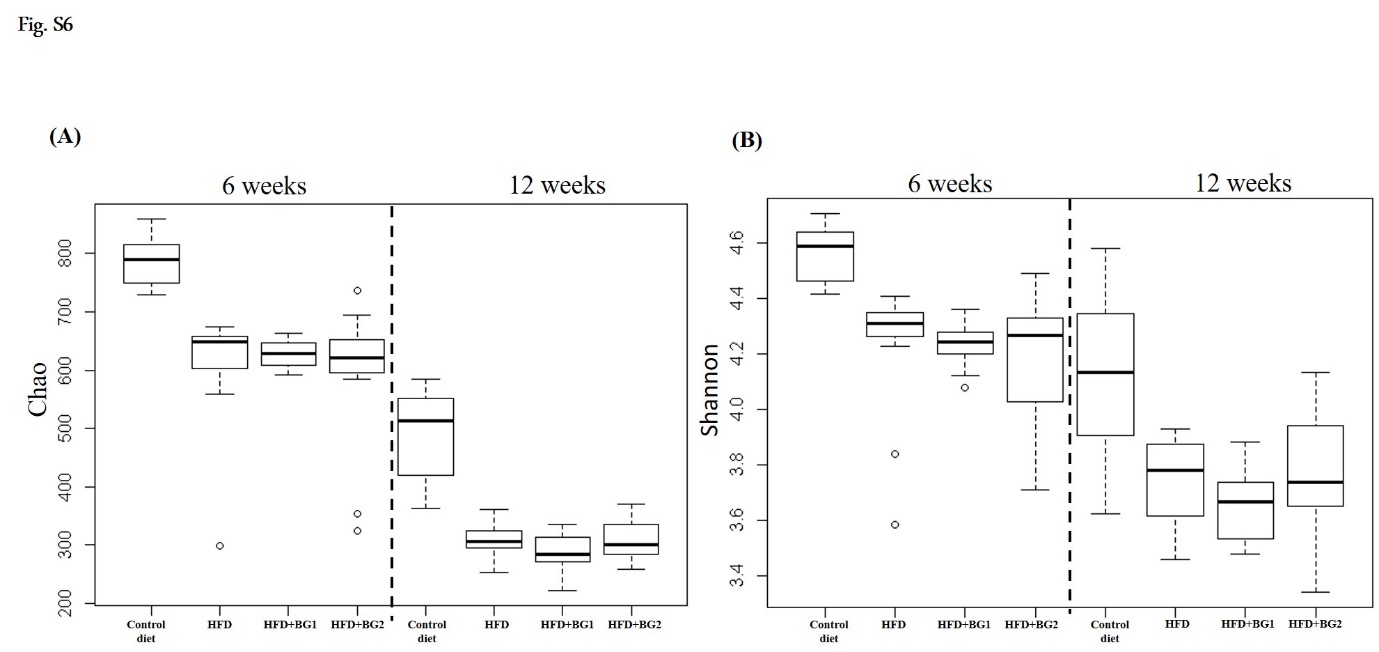
 **Online Resource Fig.S6:** Effects of feeding duration and diets on species richness (A) and evenness (B) in the mouse gut microbiota.


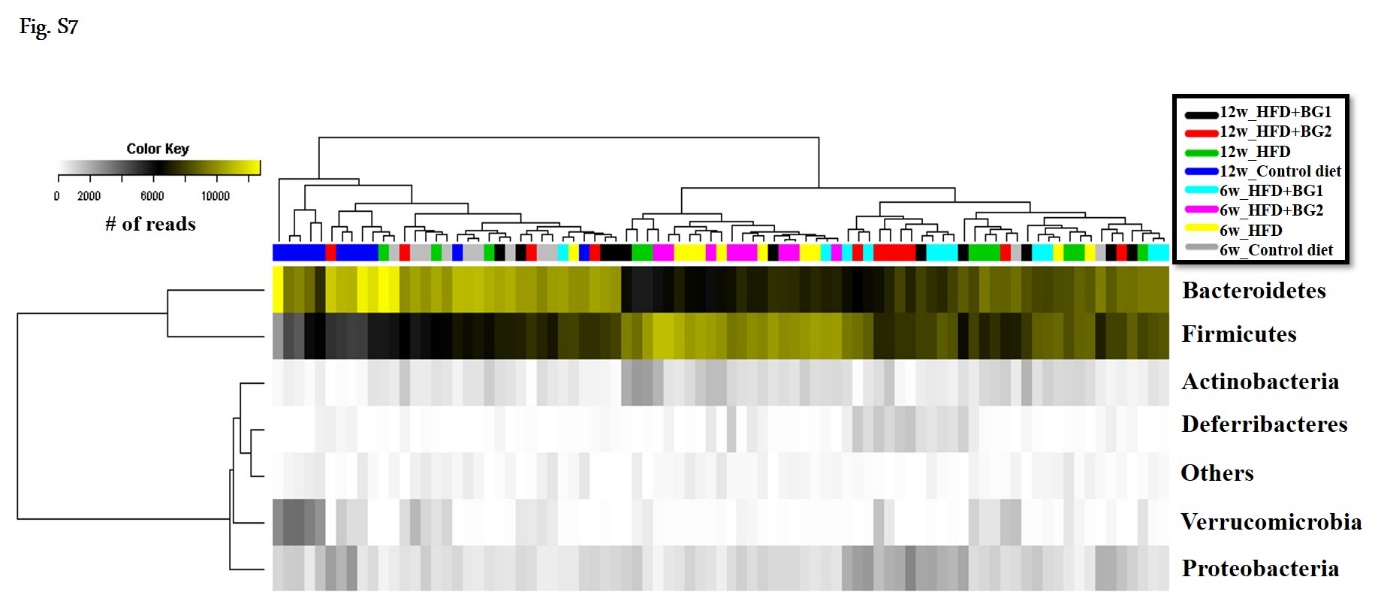
 **Online Resource Fig.S7:** Bacterial composition analysis at the phylum level.


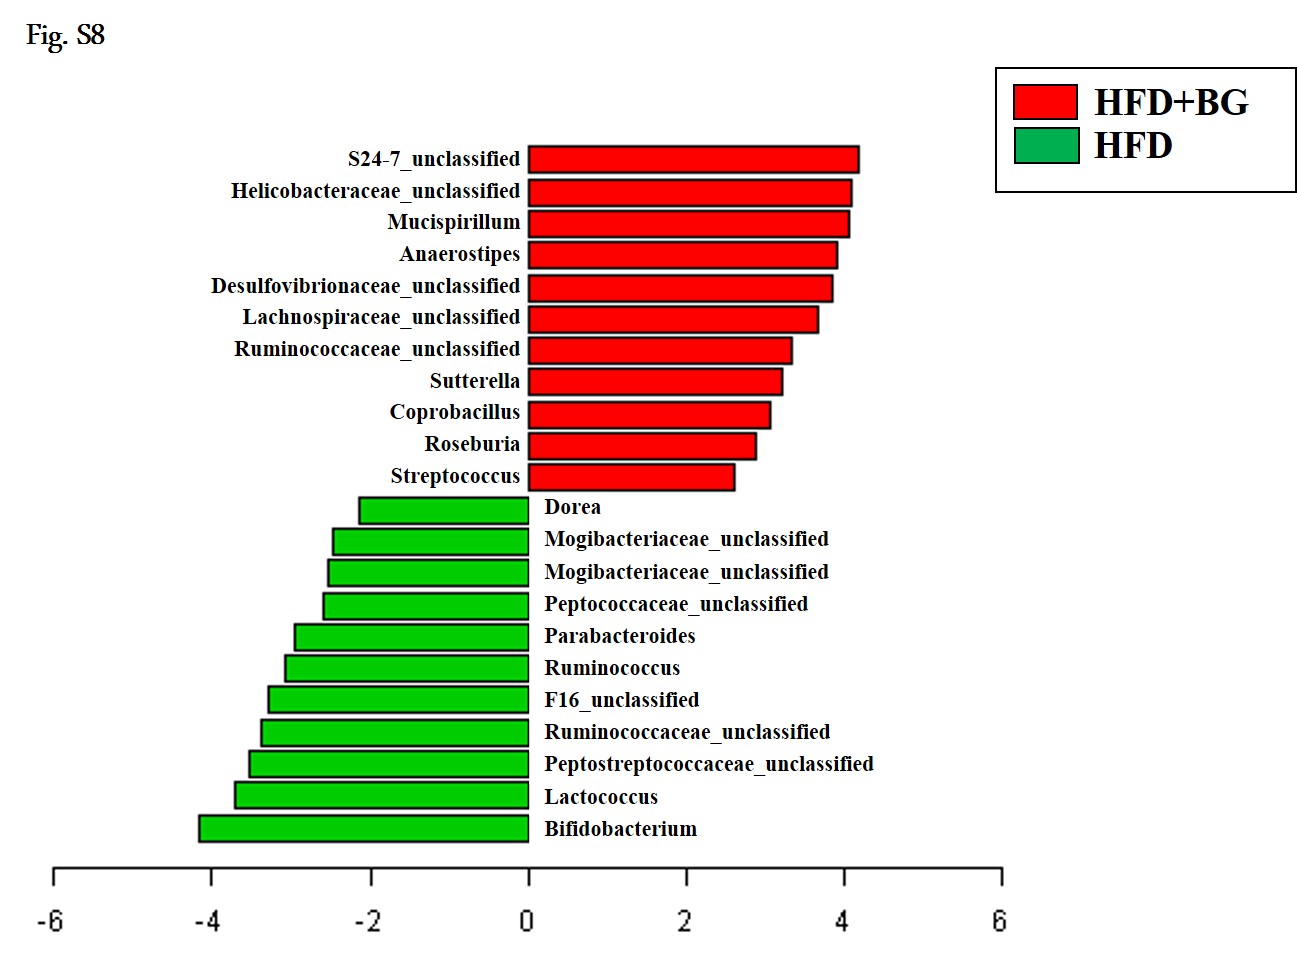
 **Online Resource Fig.S8:** Differentially abundant genera at the 12th week in control and β-glucan groups.


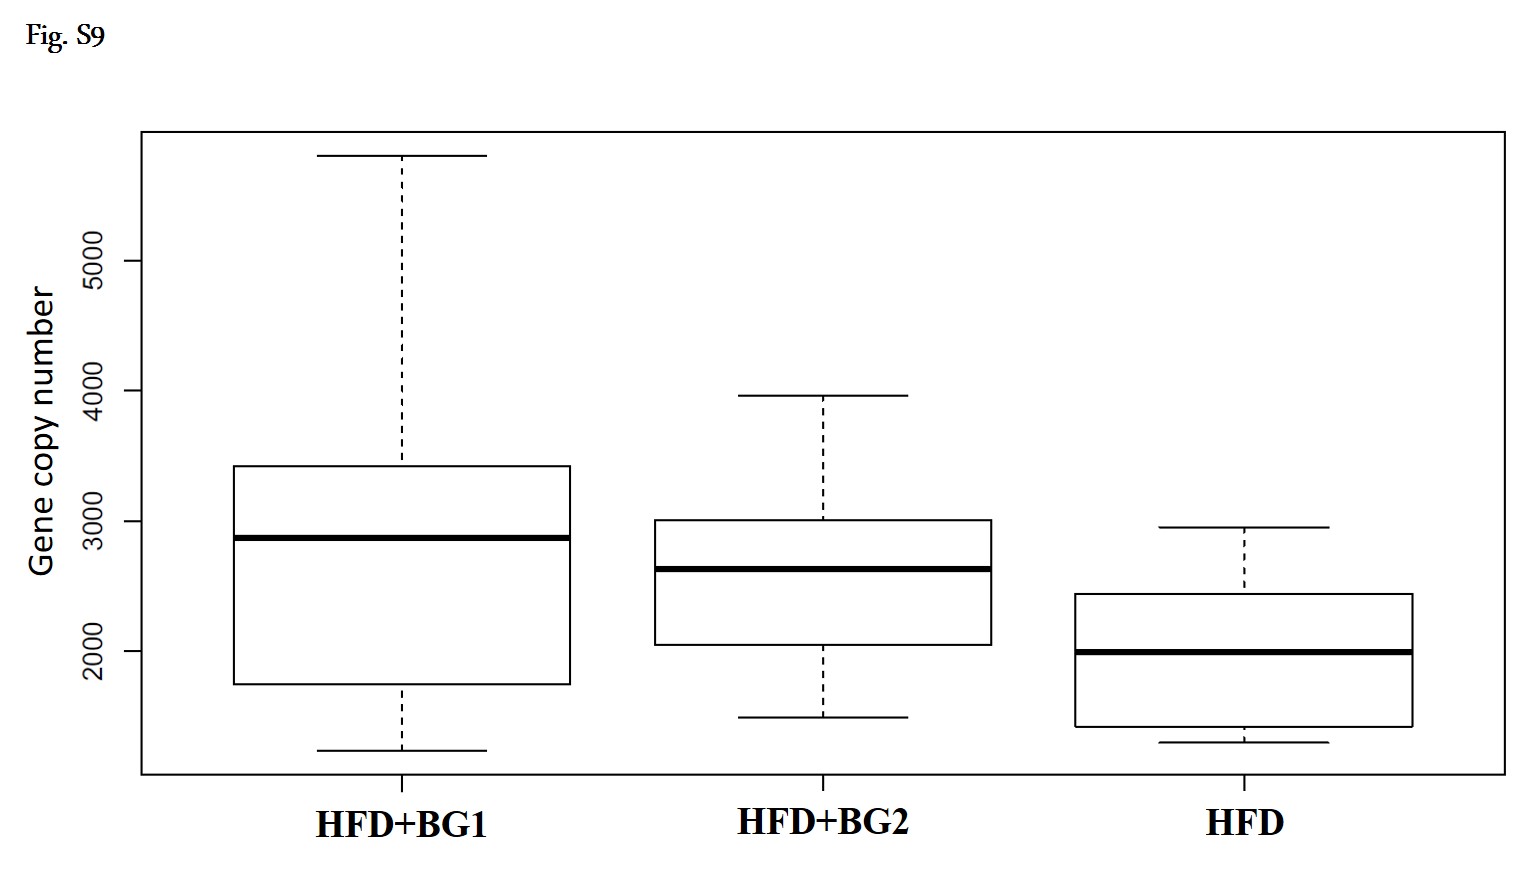
 **Online Resource Fig.S9:** Enumeration of Bifidobacterium based on qPCR for HFD group samples at the 12th week.


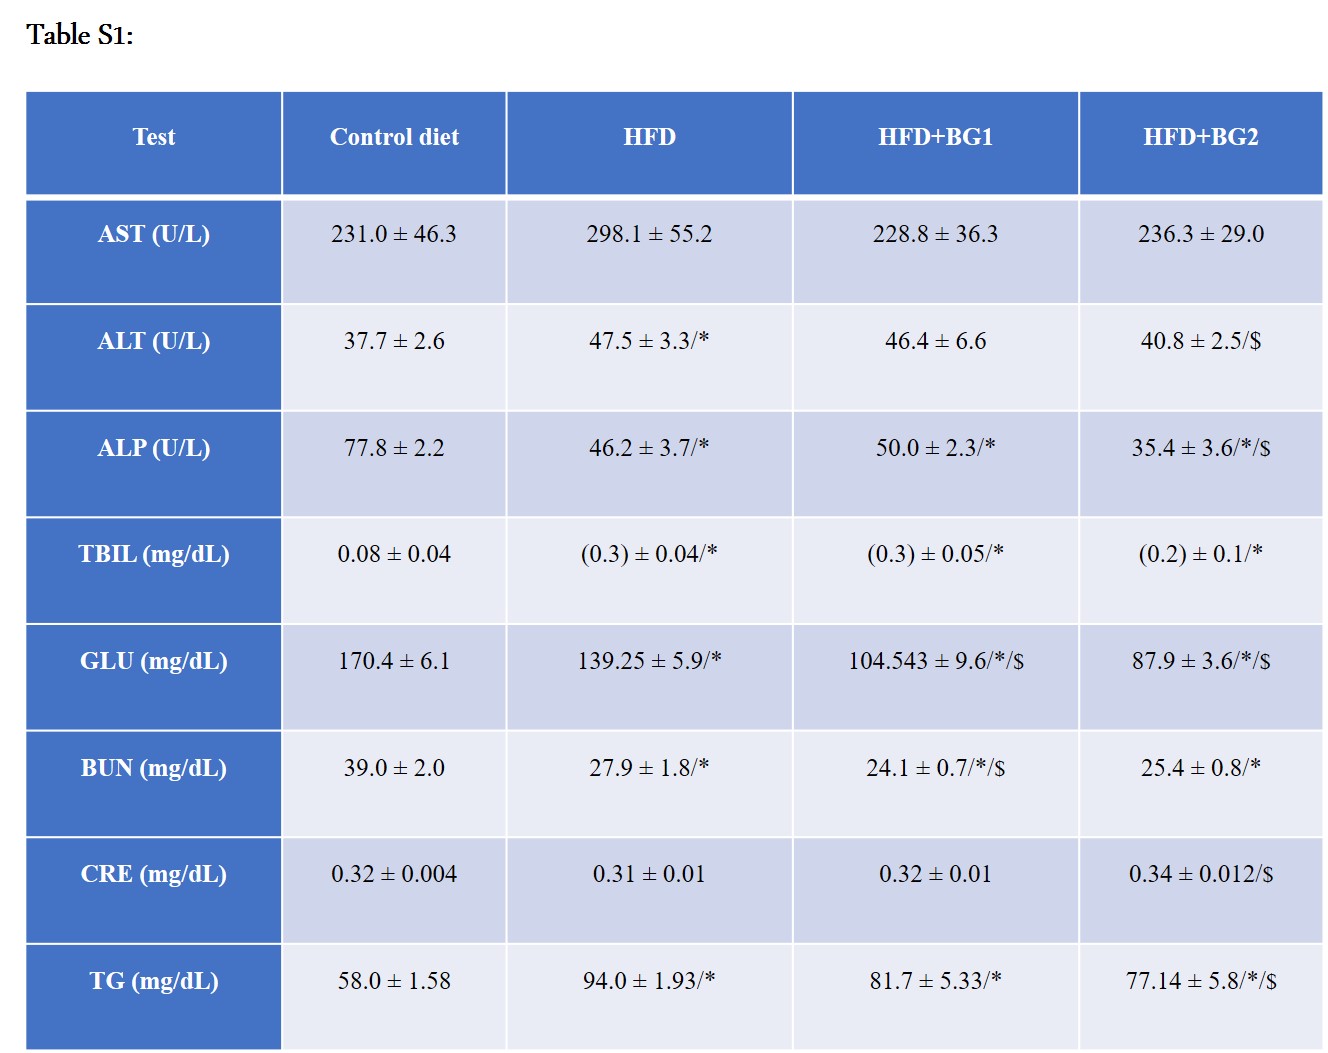


**Online Resource Table S1: Blood biochemical markers profiling** At the end of 12 weeks, mice were sacrificed using the cardiac puncture method, and blood was drawn using a sterilized syringe and needles. The collected blood samples were sent to ChemOn Inc. for the analysis of different biochemical markers as indicated in the table. AST-aspartate transaminase, ALT-alanine transaminase, ALP- alkaline phosphatase, TBIL- total bilirubin, GLU- blood glucose level, TG-triglyceride, BUN- blood urea nitrogen and CRE- creatinine. (*-compared to that of control diet; $-compared to that of HFD)
